# Supplementary material for: Surfactant-assisted hydrothermal synthesis and electrochemical properties of nanoplate-assembled 3D flower-like Cu3V2O7(OH)2·2H2O microstructures
Source: Royal Society of Chemistry journal article supplement (doi:10.1039/c0ce00083c), 2010-09-13
Supplement: c0ce00083c.pdf [file c0ce00083c.pdf]

## Supporting Information

### Surfactant-assisted hydrothermal synthesis and electrochemical properties of nanoplates-assembled 3D flower-like $\text{Cu}_3\text{V}_2\text{O}_7(\text{OH})_2 \cdot 2\text{H}_2\text{O}$ microstructures

Xiujuan Sun,<sup>a</sup> Jiawei Wang,<sup>a</sup> Yan Xing\*,<sup>a</sup> Ying Zhao,<sup>b</sup> Xianchun Liu,<sup>a</sup> Bo Liu,<sup>a</sup> Suying Hou<sup>a</sup>

<sup>a</sup>College of Chemistry, Northeast Normal University, Changchun 130024, P. R. China.  
E-mail: xingyan69cn@yahoo.com.cn

<sup>b</sup>State Key Laboratory of Inorganic Synthesis and Preparative Chemistry of Jilin University, Changchun 130012, P. R. China

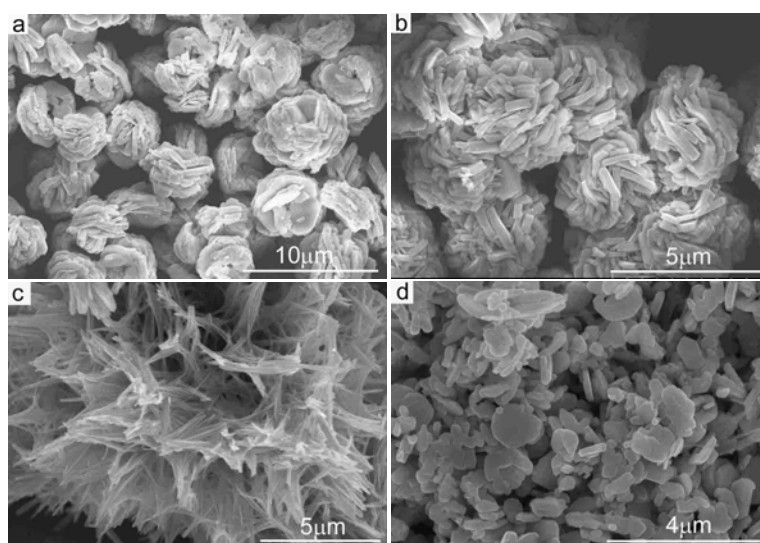

**Fig. S1.** SEM images of the products obtained at 80°C for 24h without any additives (a) and with different additives (b) CPC, (c) SDS, (d) P123.

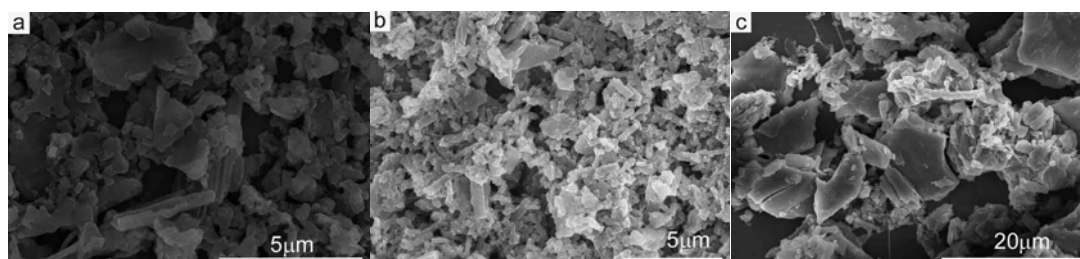

**Fig. S2.** SEM images of the samples prepared from the system with different copper sources : (a)  $\text{CuSO}_4 \cdot 5\text{H}_2\text{O}$ , (b)  $\text{CuCl}_2 \cdot 2\text{H}_2\text{O}$ , and (c)  $\text{Cu}(\text{NO}_3)_2 \cdot 5\text{H}_2\text{O}$ .

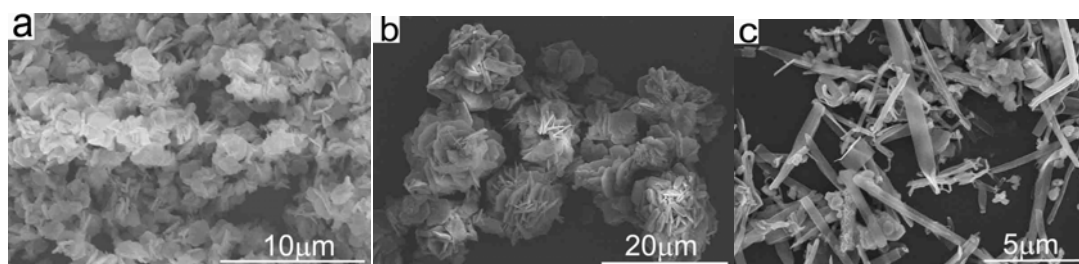

**Fig. S3.** SEM image of the products obtained under different reaction temperature: (a) 50 °C, (b) 160 °C, and (c) 180 °C.

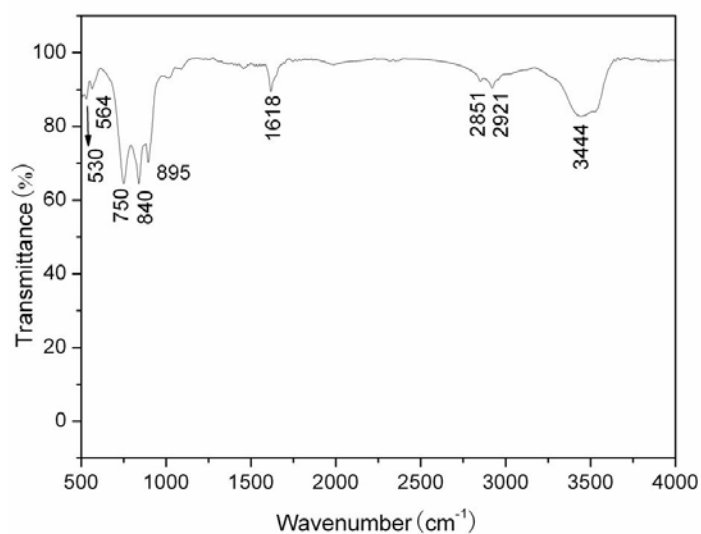

**Fig. S4.** FT-IR spectrum of the as-prepared  $\text{Cu}_3\text{V}_2\text{O}_7(\text{OH})_2 \cdot 2\text{H}_2\text{O}$  samples.

Bands at 2921 and 2851  $\text{cm}^{-1}$  can be attributed to the characteristic frequencies of residual CTAB. The bands centered at 3443 and 1617  $\text{cm}^{-1}$  can be due to the water absorbed on the surface of the samples. 895, 840, 750, 564 and 530  $\text{cm}^{-1}$  attributed to tetrahedral  $\text{VO}_4$  and octahedral  $\text{CuO}_6$  vibration modes.
